# Supplementary material for: Reprogramming of bivalent chromatin states in NRAS mutant melanoma suggests PRC2 inhibition as a therapeutic strategy
Source: PubMed Central journal article supplement — Cell Rep. Author manuscript; Available in PMC 2021 Aug 17. (PMC8369408; doi:10.1016/j.celrep.2021.109410), 2021-07-20
Supplement: NIHMS1727018-supplement-1.pdf [file NIHMS1727018-supplement-1.pdf]

**Supplemental information**

**Reprogramming of bivalent chromatin states  
in *NRAS* mutant melanoma suggests PRC2  
inhibition as a therapeutic strategy**

**Christopher J. Terranova, Ming Tang, Mayinuer Maitituoheti, Ayush T. Raman, Archit K. Ghosh, Jonathan Schulz, Samir B. Amin, Elias Orouji, Katarzyna Tomczak, Sharmistha Sarkar, Junna Oba, Caitlin Creasy, Chang-Jiun Wu, Samia Khan, Rossana Lazcano, Khalida Wani, Anand Singh, Praveen Barrodia, Dongyu Zhao, Kaifu Chen, Lauren E. Haydu, Wei-Lien Wang, Alexander J. Lazar, Scott E. Woodman, Chantale Bernatchez, and Kunal Rai**

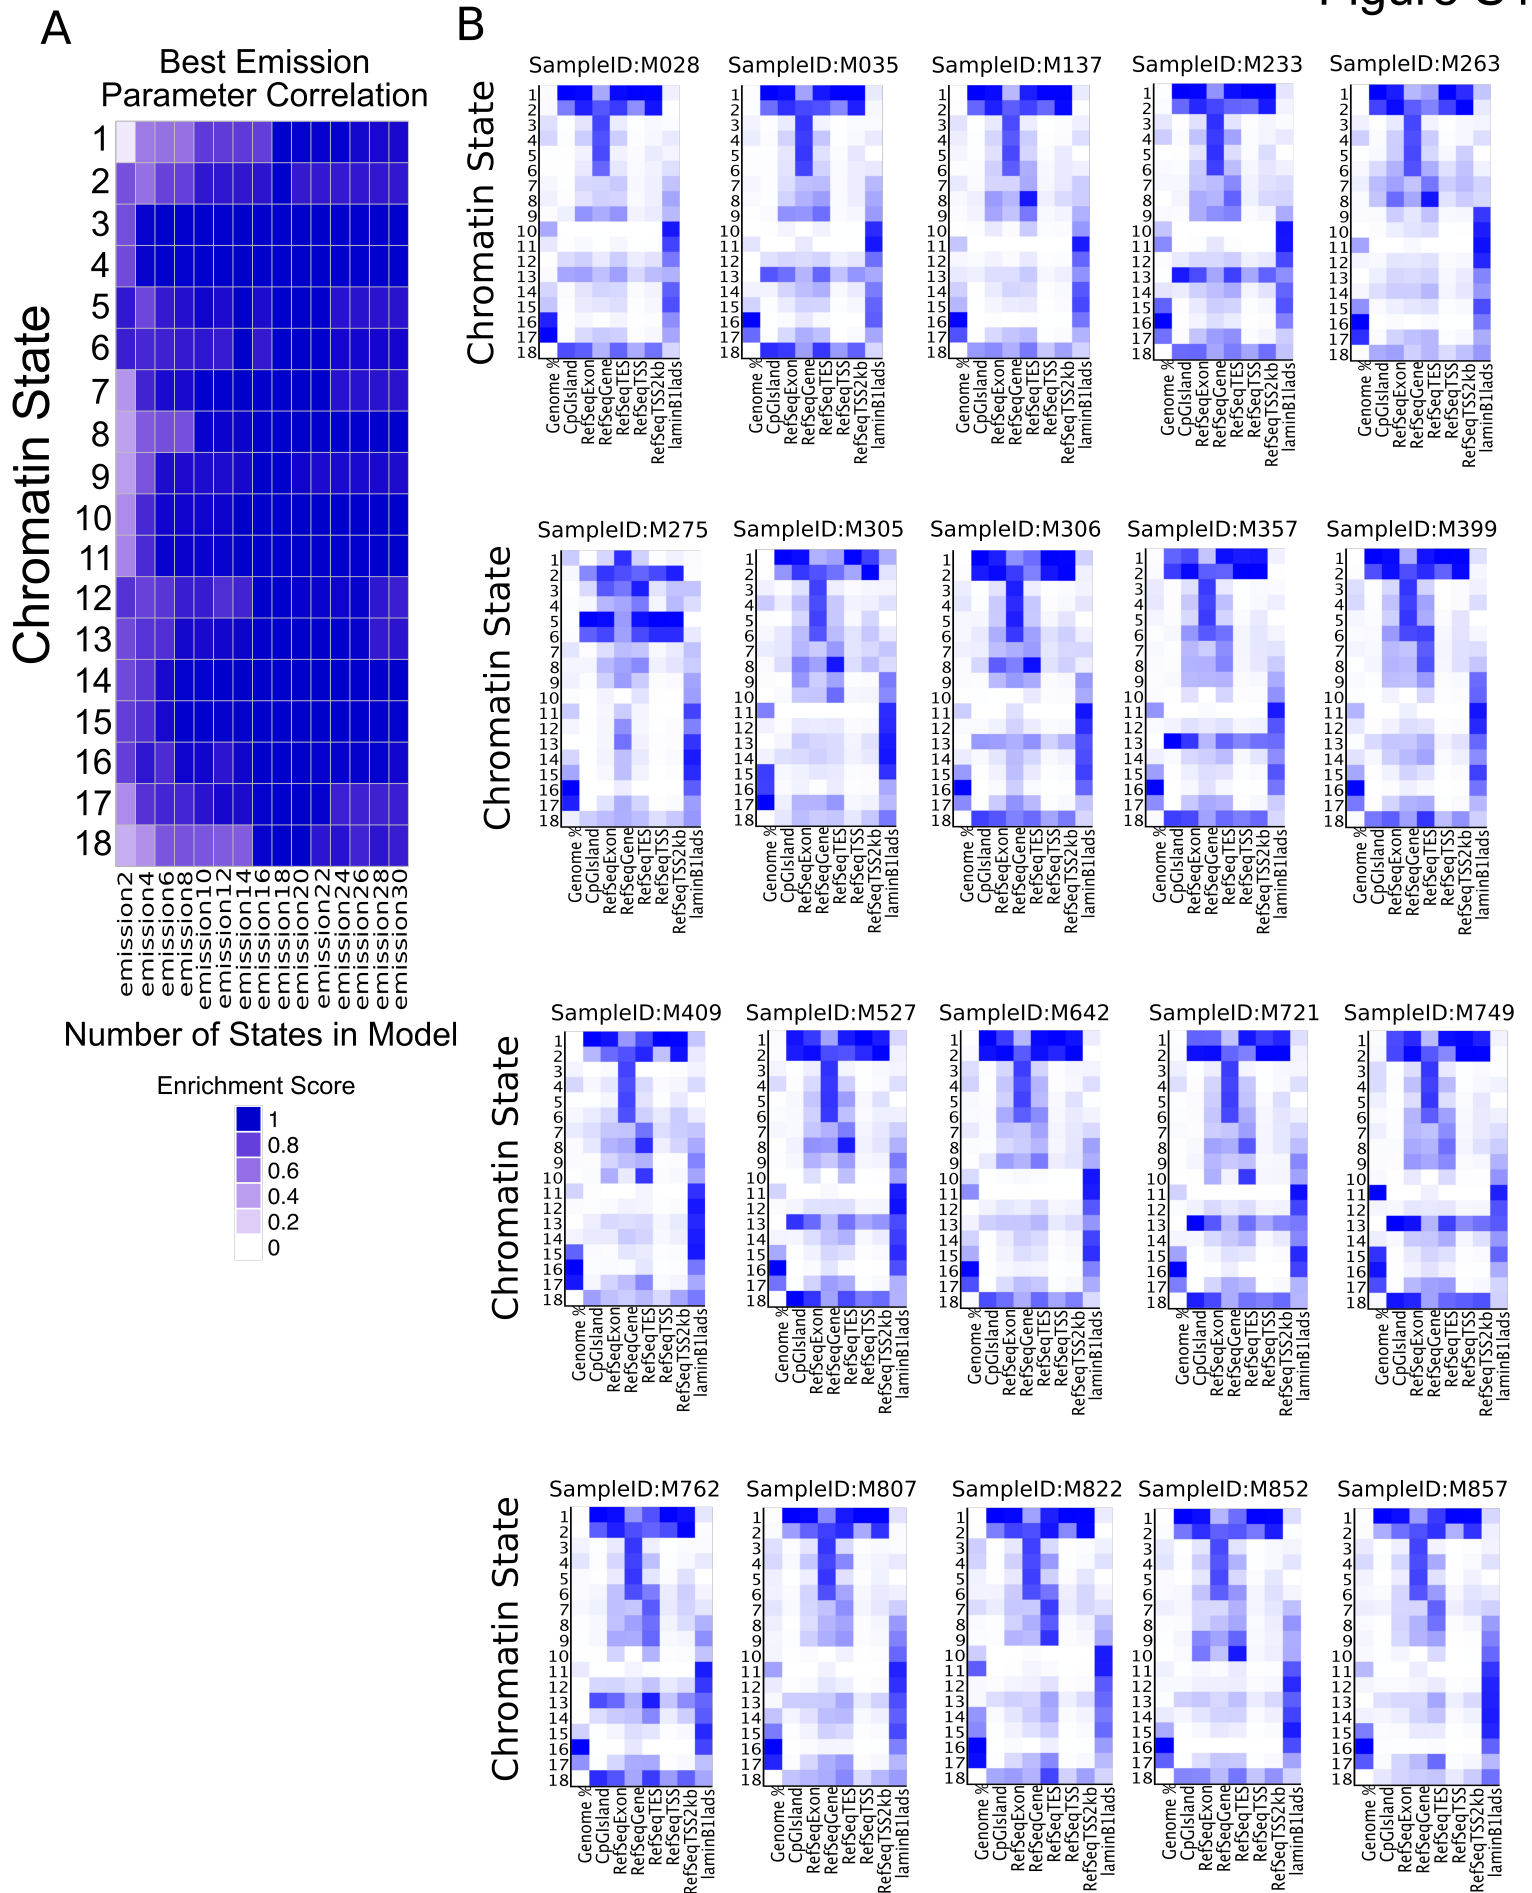

## **SUPPLEMENTAL FIGURE LEGENDS:**

**Figure S1: Representative chromatin state probabilities for melanoma tumors. Related to Figure 1 and Table S1.**

- A) Emission parameter correlation plot comparing the 18-state model used in this study and chromatin models between 2-30 states in 20 metastatic melanoma tumors samples from TCGA.
- B) Genomic annotation enrichments for each chromatin state in 20 metastatic melanoma tumor samples from TCGA.

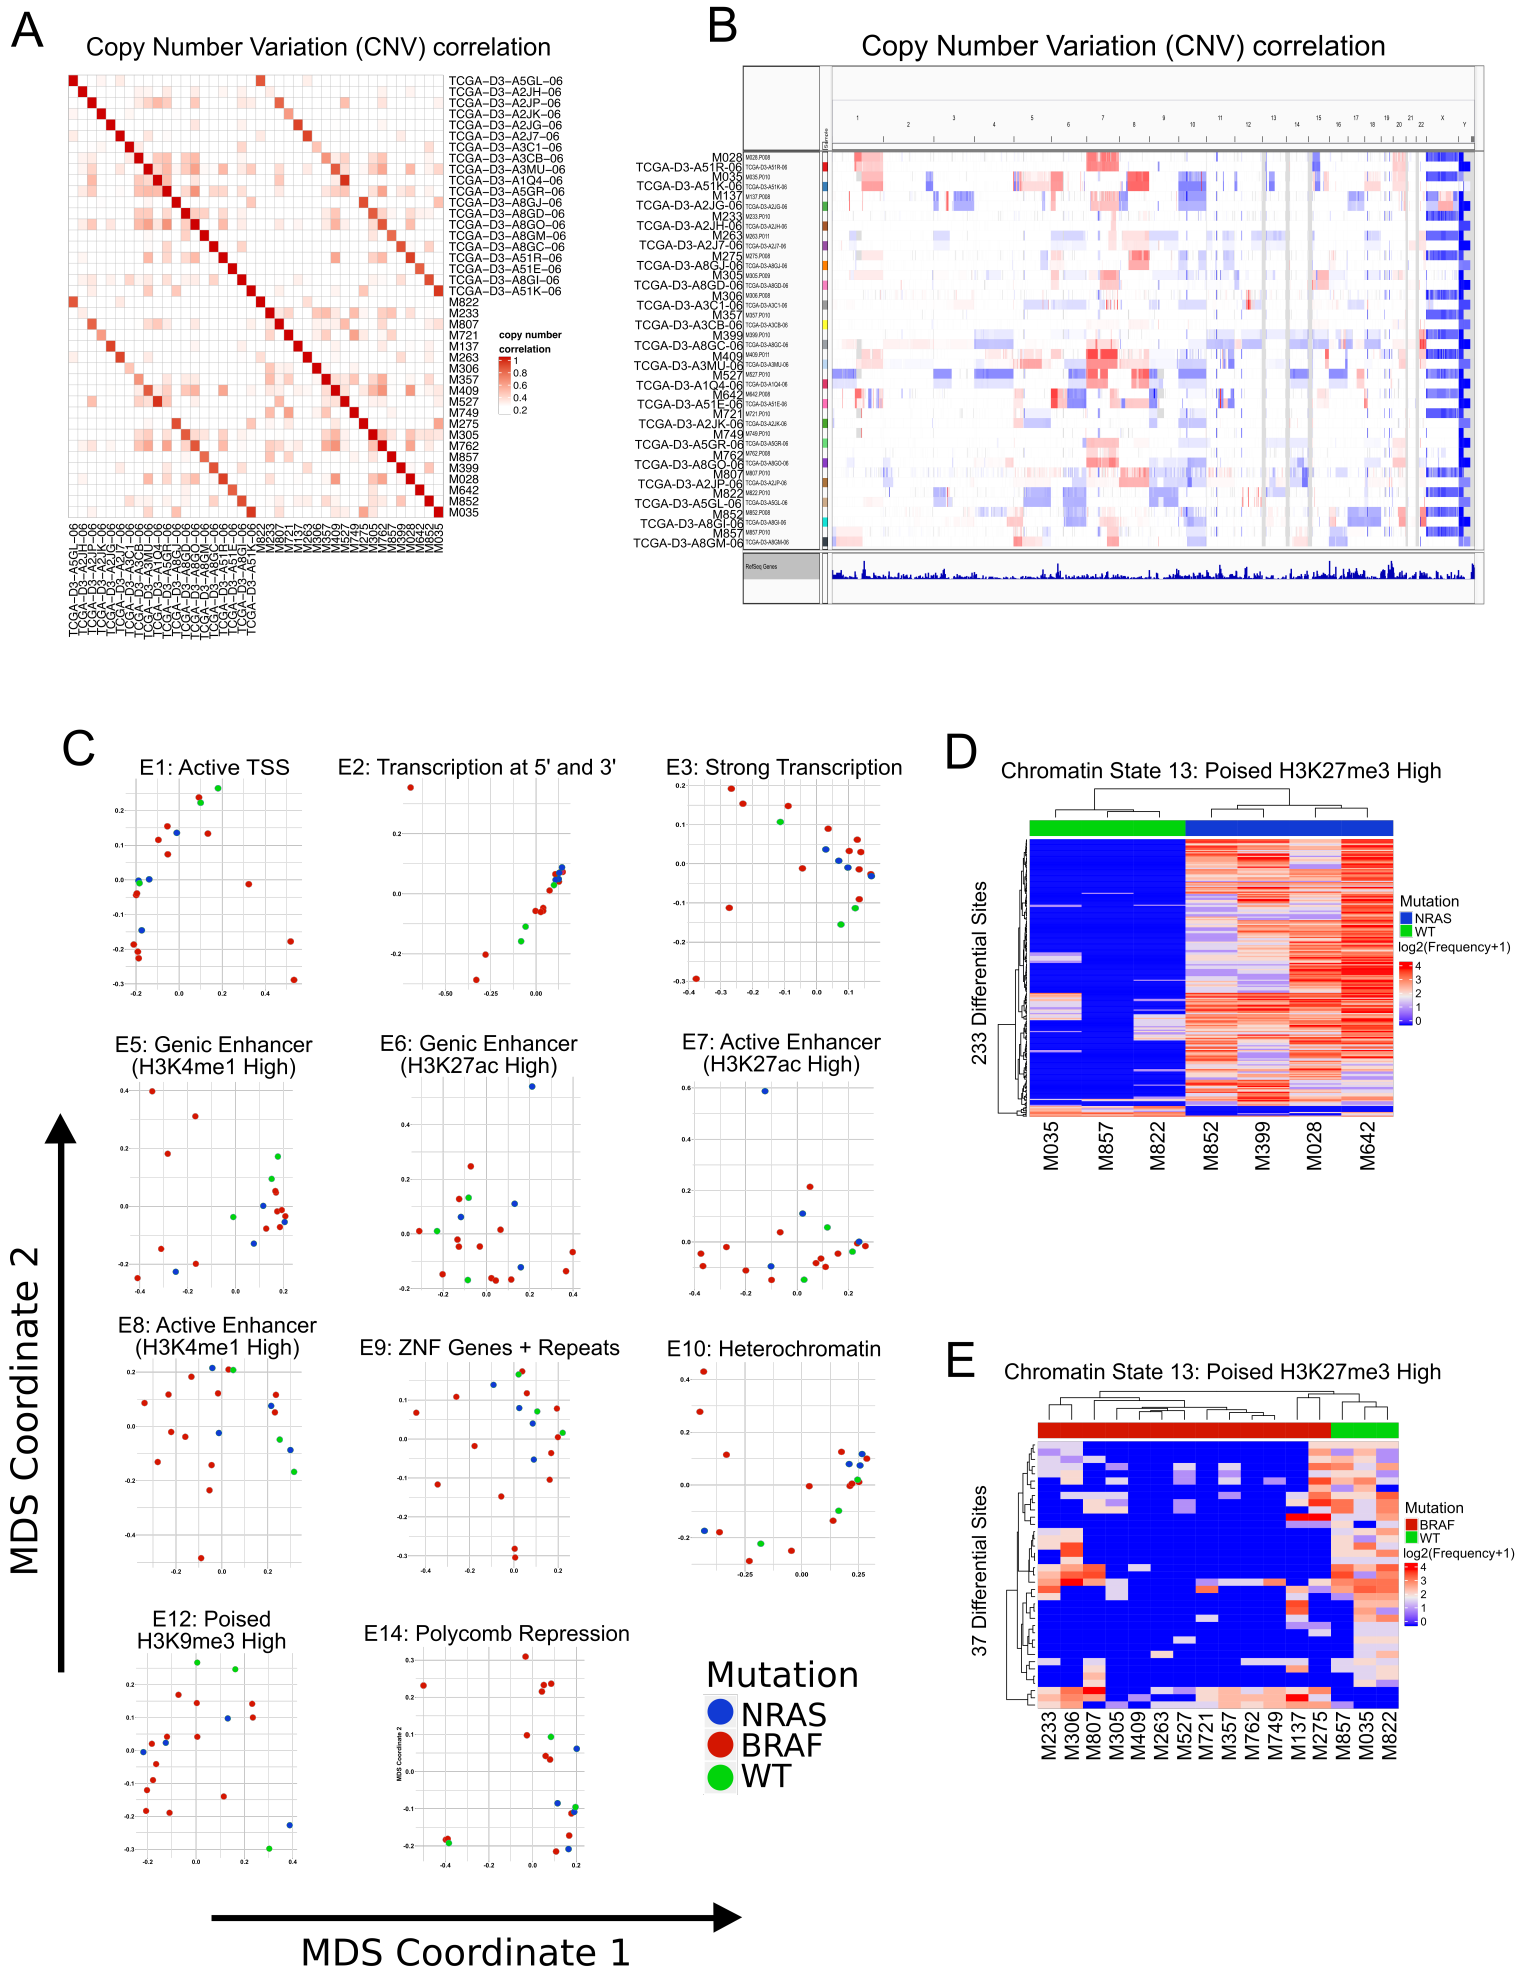

**Figure S2: Combinatorial chromatin states and copy number variation correlation for melanoma tumors; MDS and heatmap analysis of chromatin states annotated by mutational subtype. Related to Figure 1 and Table S1.**

- A) Copy Number Variation (CNV) correlation between the 20 melanoma tumors profiled and CNV classification from TCGA based on all genes.
- B) Genome browser view of CNV correlation between the 20 melanoma tumors profiled and CNV classification from TCGA.
- C) MDS analysis of chromatin states from 20 metastatic melanoma tumors annotated by mutation (*NRAS*, *BRAF*, WT) based on TCGA classification.
- D) Heatmap displaying differentially regulated regions (FDR < 0.05) of chromatin state 13 (poised H3K27me3 high) between *NRAS* and WT tumor subtypes.
- E) Heatmap displaying differentially regulated regions (FDR < 0.05) of chromatin state 13 (poised H3K27me3 high) between *BRAF* and WT tumor subtypes.

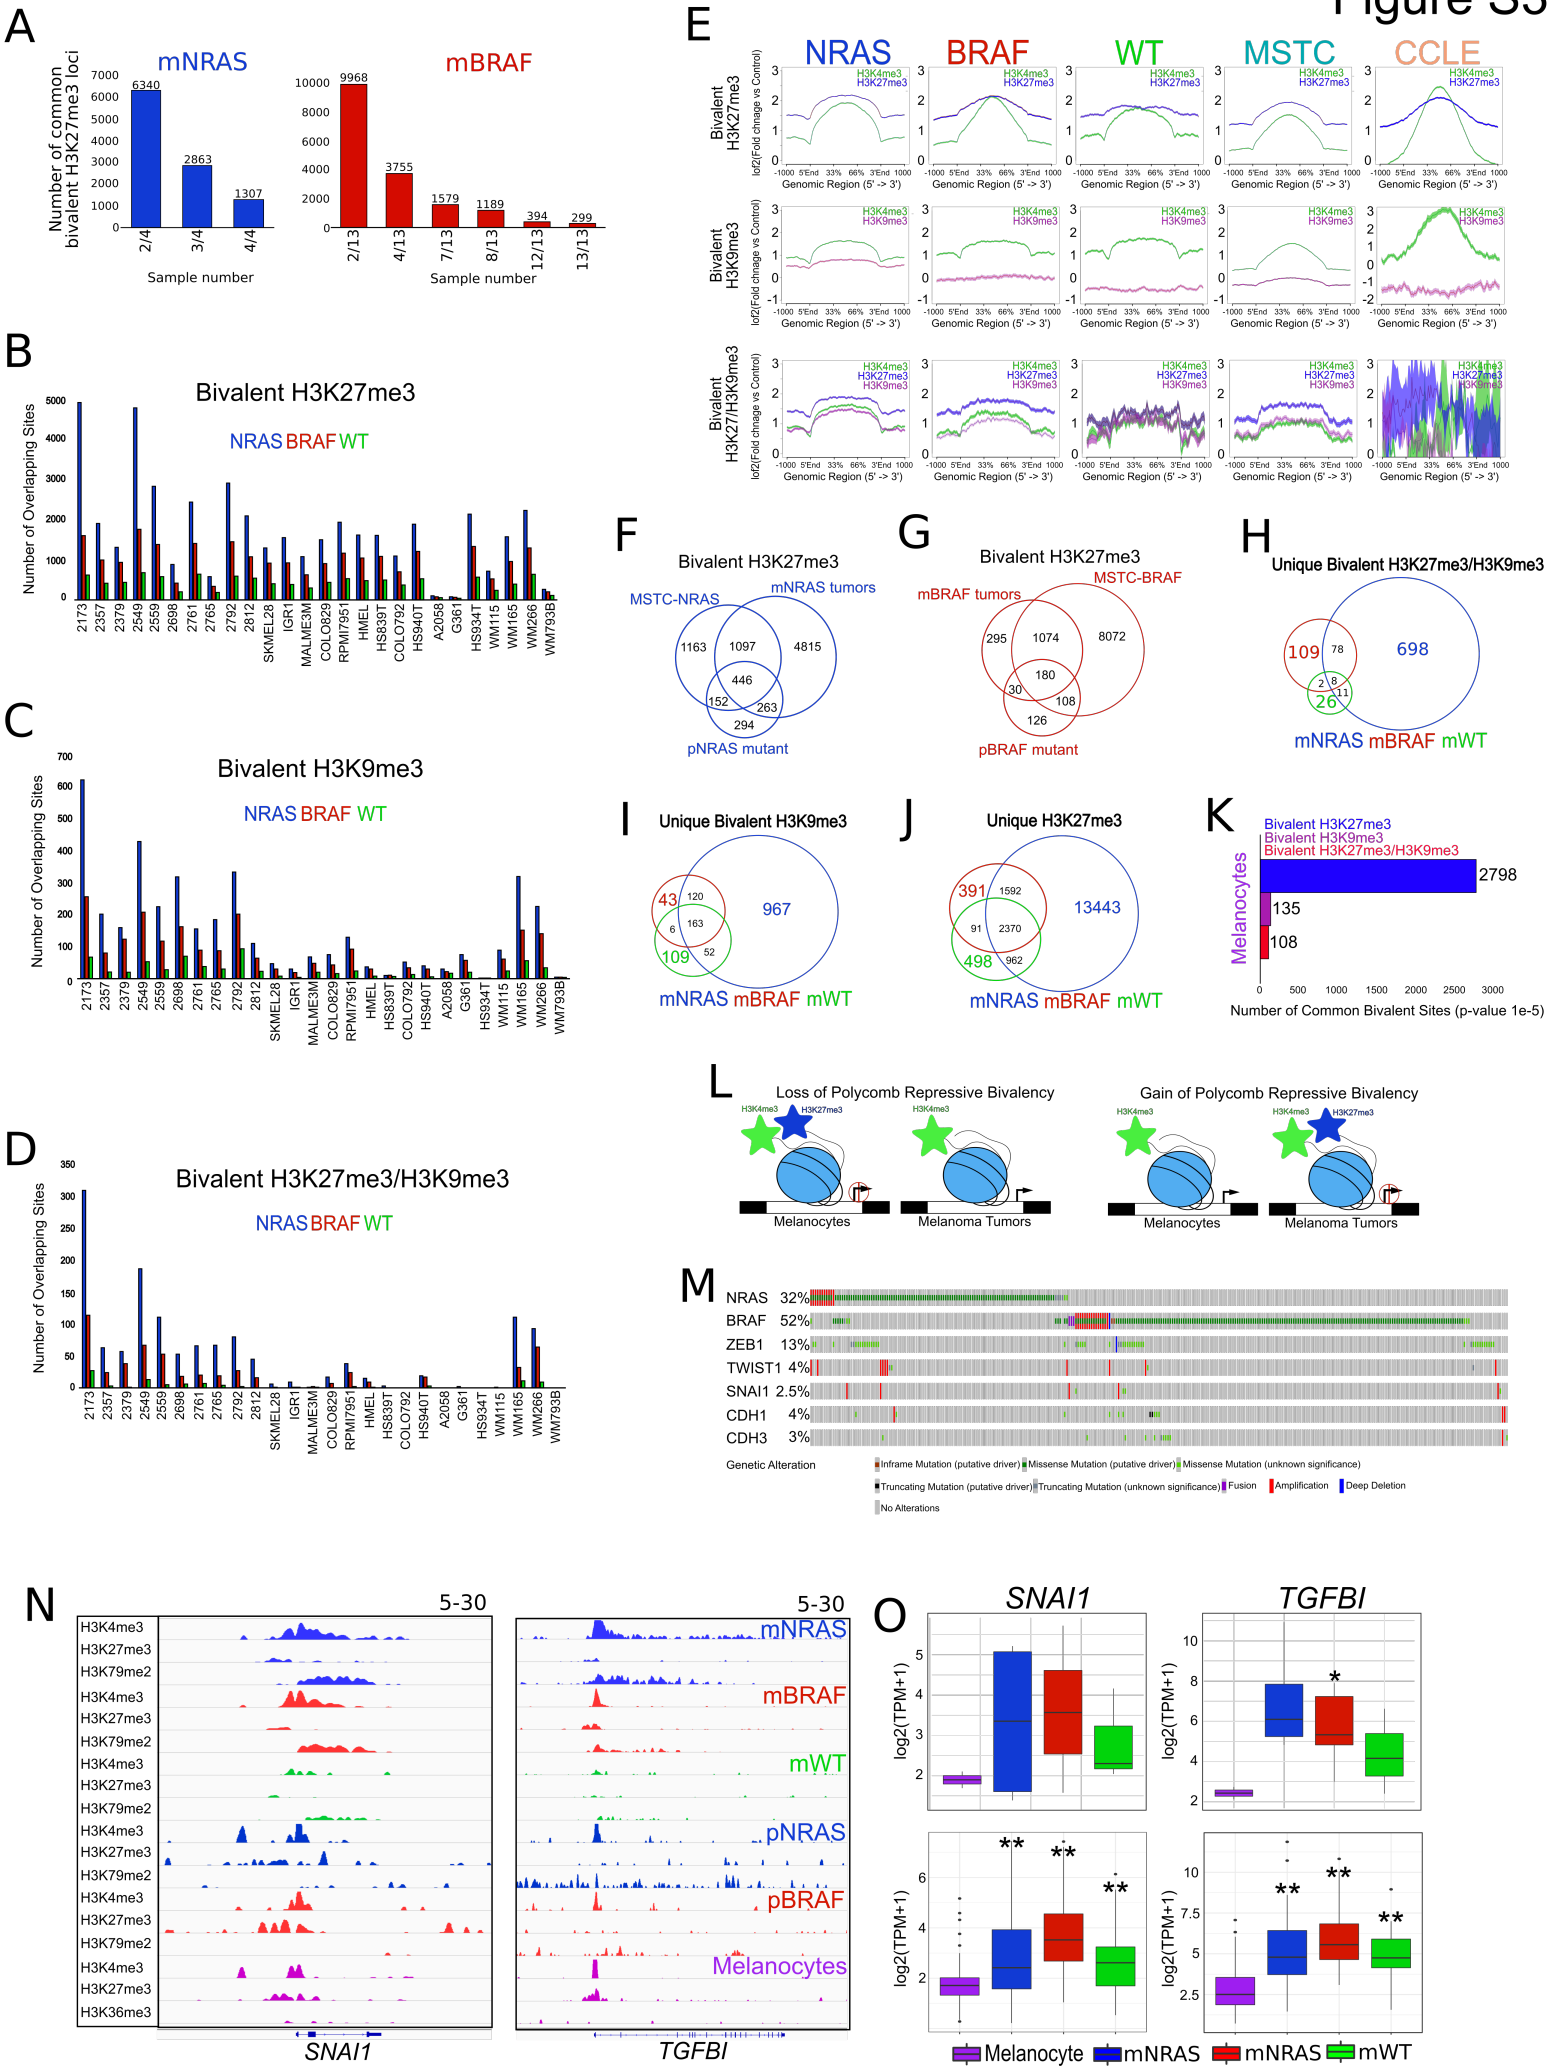

**Figure S3: Genome-wide analysis of bivalent H3K27me3 and H3K9me3 associated loci. Related to Figure 1, Figure 2 and Table S2.**

- A) Number of common bivalent H3K27me3 associated loci in *NRAS*- and *BRAF*- mutant tumors.
- B) Co-occupancy analysis of common bivalent H3K27me3 associated loci in melanoma tumor subtypes directly overlapping bivalent H3K27me3 associated loci in individual MSTC or CCLE lines.
- C) Co-occupancy analysis of common bivalent H3K9me3 associated loci in melanoma tumor subtypes directly overlapping bivalent H3K9me3 associated loci in individual MSTC or CCLE lines.
- D) Co-occupancy analysis of common bivalent H3K27/H3K9me3 associated loci in melanoma tumor subtypes directly overlapping total bivalent H3K27/H3K9me3 associated loci in individual MSTC or CCLE lines.
- E) Average density profiles of common bivalent H3K27me3, bivalent H3K9me3 and bivalent H3K27/H3K9me3 loci in melanoma tumor subtypes, MSTC and CCLE lines.
- F) Venn diagram analysis of bivalent H3K27me3 associated loci in *NRAS*-mutant melanoma tumors (mNRAS), *NRAS*-mutant MSTC (MSTC-2125, MSTC-2770, MSTC-2495) and pNRAS isogenic mutant melanocytes.
- G) Venn diagram analysis of bivalent H3K27me3 associated loci in *BRAF*-mutant melanoma tumors (mBRAF), *BRAF*-mutant MSTC (MSTC-2549, MSTC-2765, MSTC-2357) and pBRAF isogenic mutant melanocytes.
- H-J) Venn diagram analysis of bivalent H3K27me3/H3K9me3, I) bivalent H3K9me3 and J) polycomb H3K27me3 associated loci in melanoma tumor subtypes.
- K) Common bivalent H3K27me3, bivalent H3K9me3 and bivalent H3K27/H3K9me3 associated loci in primary melanocytes from Roadmap. Associated loci were identified as common if they were present in 2/2 melanocytes.
- L) Schematic of bivalent H3K27me3 associated losses and gains between melanocytes and melanoma tumors.
- M) OncoPrint of all possible genetic alterations in *NRAS*, *BRAF*, *ZEB1*, *TWIST1*, *SNAI1*, *CDH1* and *CHD3* genes from 363 skin cutaneous melanoma samples.
- N) Genome browser view of ChIP-seq tracks for H3K4me3, H3K27me3 and active transcription (H3K79me2/H3K36me3) on the *SNAI1* and *TGFBI* genes in mNRAS, mBRAF, mWT melanoma tumor subtypes, isogenic mutant melanocytes and primary melanocytes from Roadmap.
- O) Boxplot displaying quantile normalized mean RNA-expression profiles (log<sub>2</sub> TPM) of the *SNAI1* and *TGFBI* genes in melanocytes (n=2) and melanoma tumor subtypes (NRAS=4, BRAF=13, WT=3) with associated chromatin profiles (top) and in a large cohort of melanocytes (n= 86) and melanoma tumor subtypes (NRAS=81, BRAF=118, WT=38 (bottom)). P-values were calculated using a wilcoxon test. \* = p-value < 0.05; \*\* = p-value <0.0001.

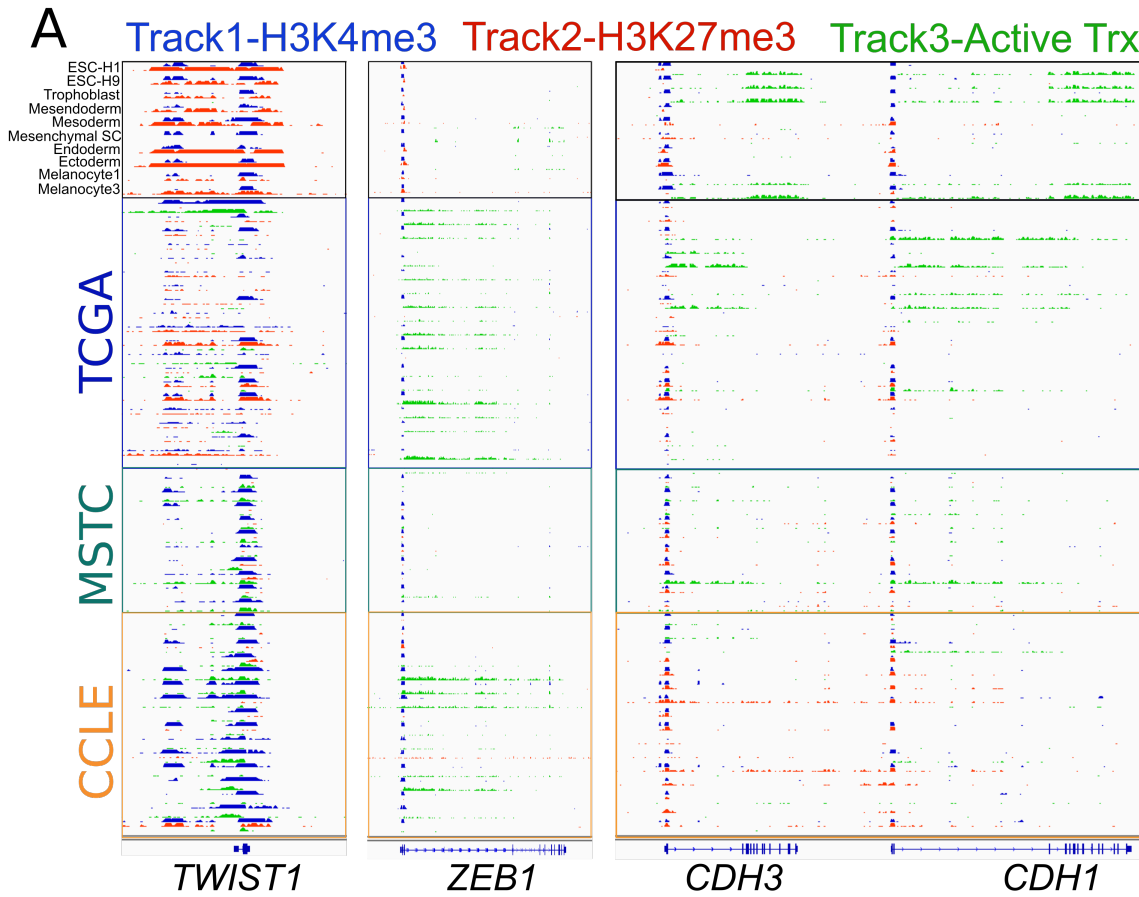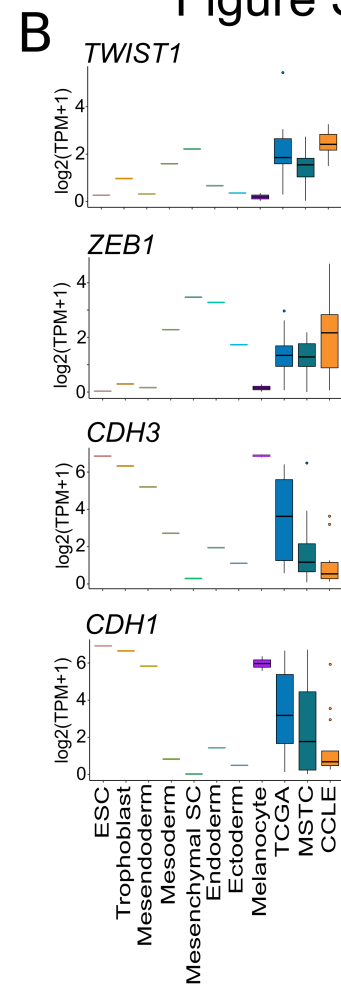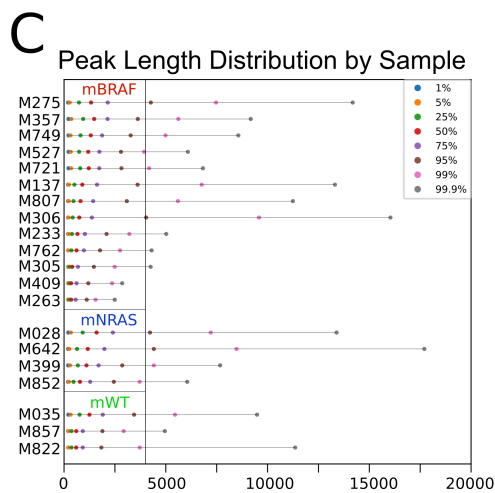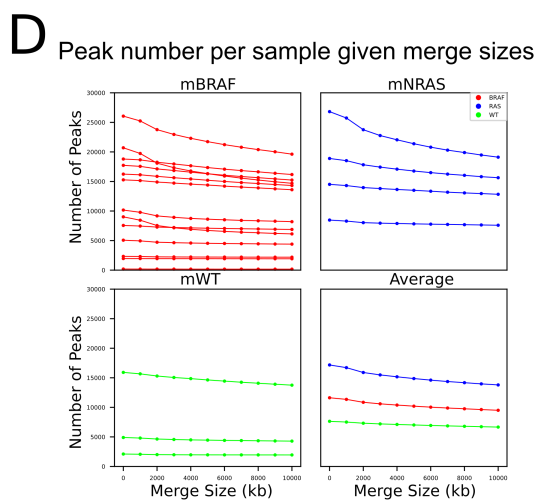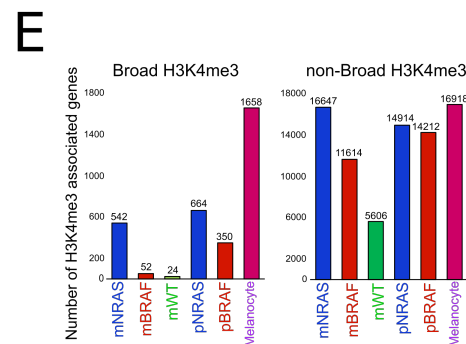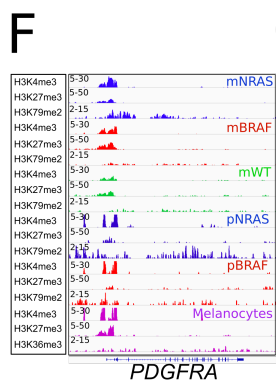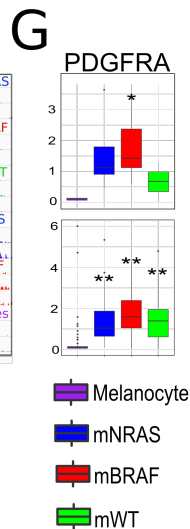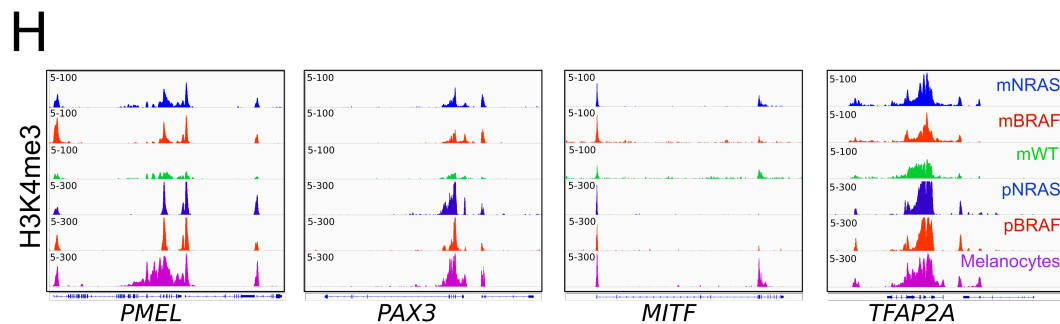



**Figure S4: EMT-TF genes gain and lose bivalent domains during melanoma progression; Broad H3K4me3 domains as an epigenetic feature in metastatic melanoma. Related to Figure 2, Figure 3, Figure 4, Table S3, Table S4 and Table S5.**

A) Genome browser view of ChIP-seq tracks for H3K4me3, H3K27me3 and active transcription (H3K79me2/H3K36me3) on the *TWIST1*, *ZEB1*, *CDH3* and *CDH3* genes in ESC, Trophoblast, Mesendoderm, Mesoderm, Mesenchymal Stem Cells, Endoderm, Ectoderm, melanocytes from Roadmap and TCGA tumors, MSTC and CCLE cell lines.

B) Boxplots displaying quantile normalized mean RNA-expression profiles (log<sub>2</sub> TPM) of the *TWIST1*, *ZEB1*, *CDH3* and *CDH3* genes in ESC, Trophoblast, Mesendoderm, Mesoderm, Mesenchymal Stem Cells, Endoderm, Ectoderm, melanocytes from Roadmap and TCGA tumors, MSTC and CCLE cell lines.

C) Quartile plot displaying peak length distribution based on percentage of broadest H3K4me3 domains in mBRAF, mNRAS and mWT melanoma tumors. Black line denotes 4kb peak length.

D) LinePlot displaying total H3K4me3 peak number at merge sizes between 1kb to 10kb in mBRAF, mNRAS and mWT samples. Bottom right plot displays average by mutational subtype.

E) Barplot of broad H3K4me3 (> 4kb) and non-broad H3K4me3 (< 4kb) domains in mNRAS, mBRAF, mWT melanoma tumor subtypes, isogenic mutant melanocytes and primary melanocytes from Roadmap.

F) Genome browser view of ChIP-seq tracks for H3K4me3, H3K27me3 and active transcription (H3K79me2/H3K36me3) on the *PDGFRA* gene in mNRAS, mBRAF, mWT melanoma tumor subtypes, isogenic mutant melanocytes and primary melanocytes from Roadmap.

G) Boxplot displaying quantile normalized mean RNA-expression profiles (log<sub>2</sub> TPM) of the *PDGFRA* gene in melanocytes (n=2) and melanoma tumor subtypes (NRAS=4, BRAF=13, WT=3) with associated chromatin profiles (top) and in a large cohort of melanocytes (n= 86) and melanoma tumor subtypes (NRAS=81, BRAF=118, WT=38 (bottom)). P-values were calculated using a wilcoxon test. \* = p-value < 0.05; \*\* = p-value <0.0001.

H) Genome browser view of ChIP-seq tracks displaying H3K4me3 on the *PMEL*, *PAX3*, *MITF* and *TFAP2A* genes in mNRAS, mBRAF, mWT melanoma tumor subtypes, isogenic mutant melanocytes and primary melanocytes from Roadmap.

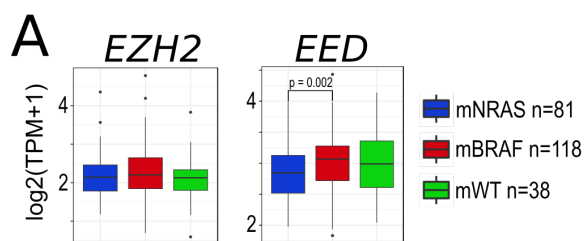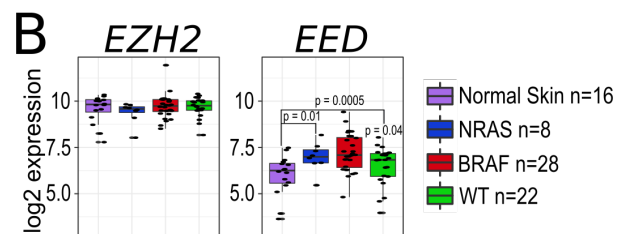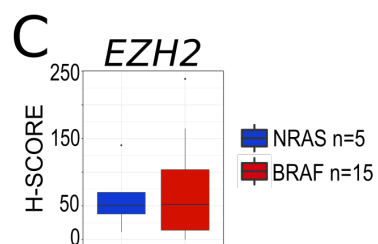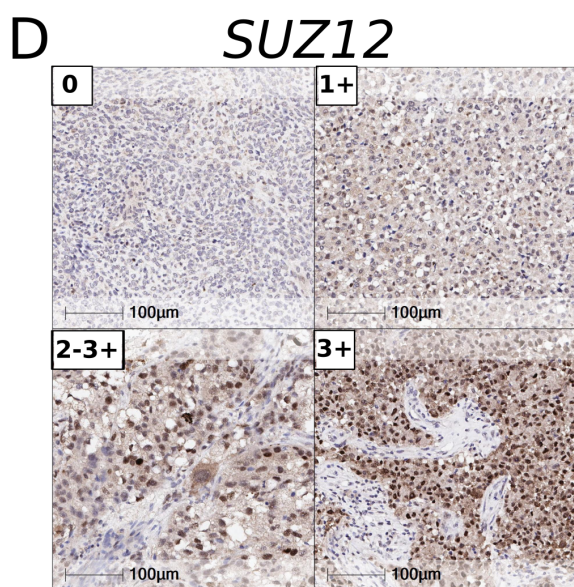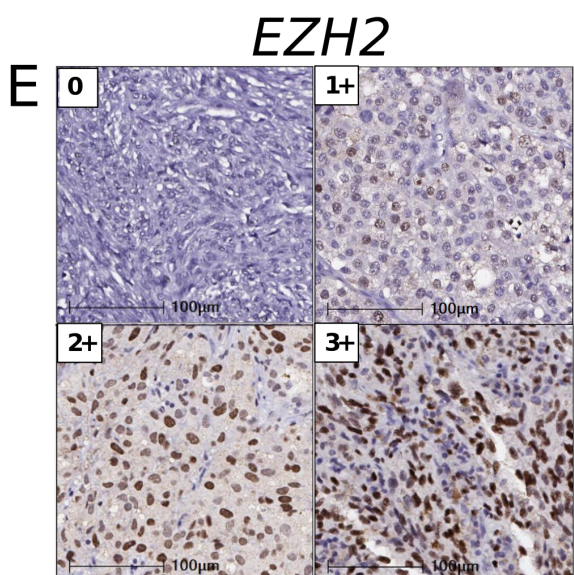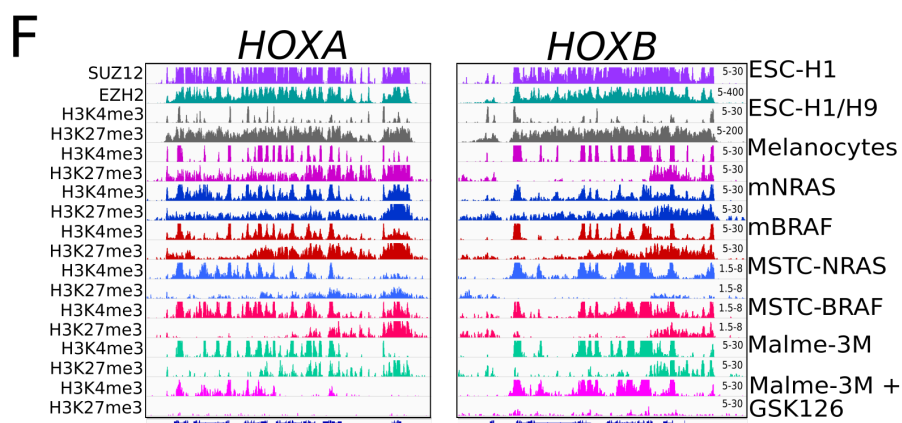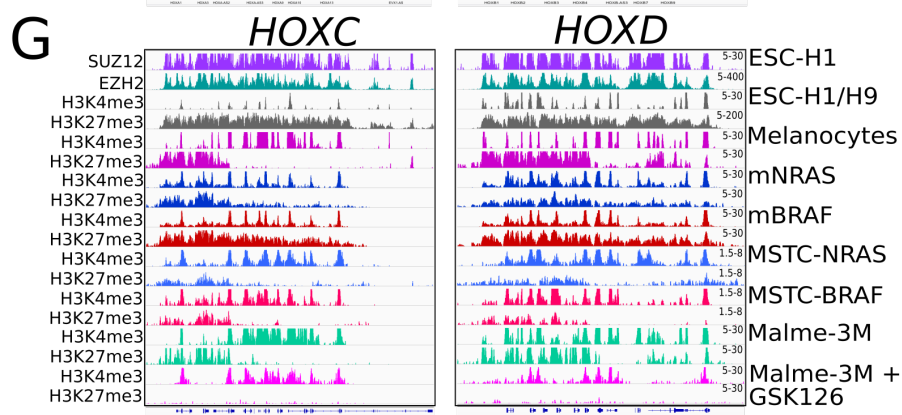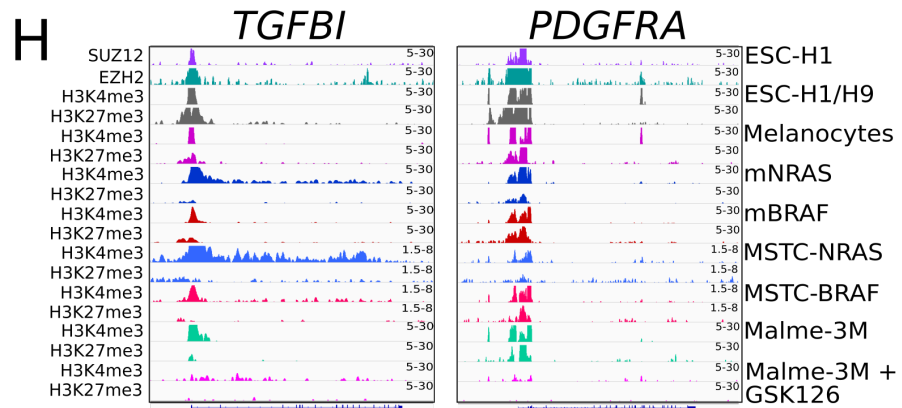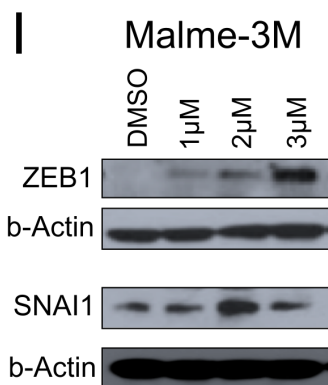

**Figure S5: PRC2 is expressed in *NRAS*-mutant melanomas. Related to Figure 5.**

A) Boxplot displaying quantile normalized mean RNA-expression profiles (log<sub>2</sub> TPM) for the *EZH2* and *EED* genes in melanoma tumor subtypes (*NRAS*=81, *BRAF*=118, WT=38) from the TCGA dataset.

B) Boxplot displaying microarray profiles (log<sub>2</sub>) in normal skin and melanoma tumors for the *EZH2* and *EED* genes from the GSE15605 dataset.

C) Boxplot displaying H-SCORES from *EZH2* immunohistochemistry staining in patient TMA harboring an *NRAS*-mutation (patients = 5; samples = 10) or *BRAF*-mutation (patients = 15; samples = 31). P-values were calculated using a t-test based on H-SCORES in each mutational subtype.

D) Representative images from immunohistochemistry staining for *SUZ12* in patient TMA. Scale bar represent 100μM.

E) Representative images from immunohistochemistry staining for *EZH2* in patient TMA. Scale bar represent 100μM.

F-H) Genome browser view of ChIP-seq tracks for *SUZ12*, *EZH2*, H3K4me<sub>3</sub> and H3K27me<sub>3</sub> in ESCs, and H3K4me<sub>3</sub> and H3K27me<sub>3</sub> in melanocytes, m*NRAS* and m*BRAF* tumors, representative *NRAS*-mutant MSTC (MSTC-2125, MSTC-2770, MSTC-2495), *BRAF*-mutant MSTC (MSTC-2549, MSTC-2765, MSTC-2357), and in Malme-3M cells treated for 14 days with GSK-126 or DMSO on the F-G) *HOX* cluster genes and H) EMT-TF genes *TGFBI* and *PDGFRA*.

I) Western blotting analysis for *ZEB1* and *SNAI1* in Malme-3M cells treated for 14 days with GSK-126 or DMSO.

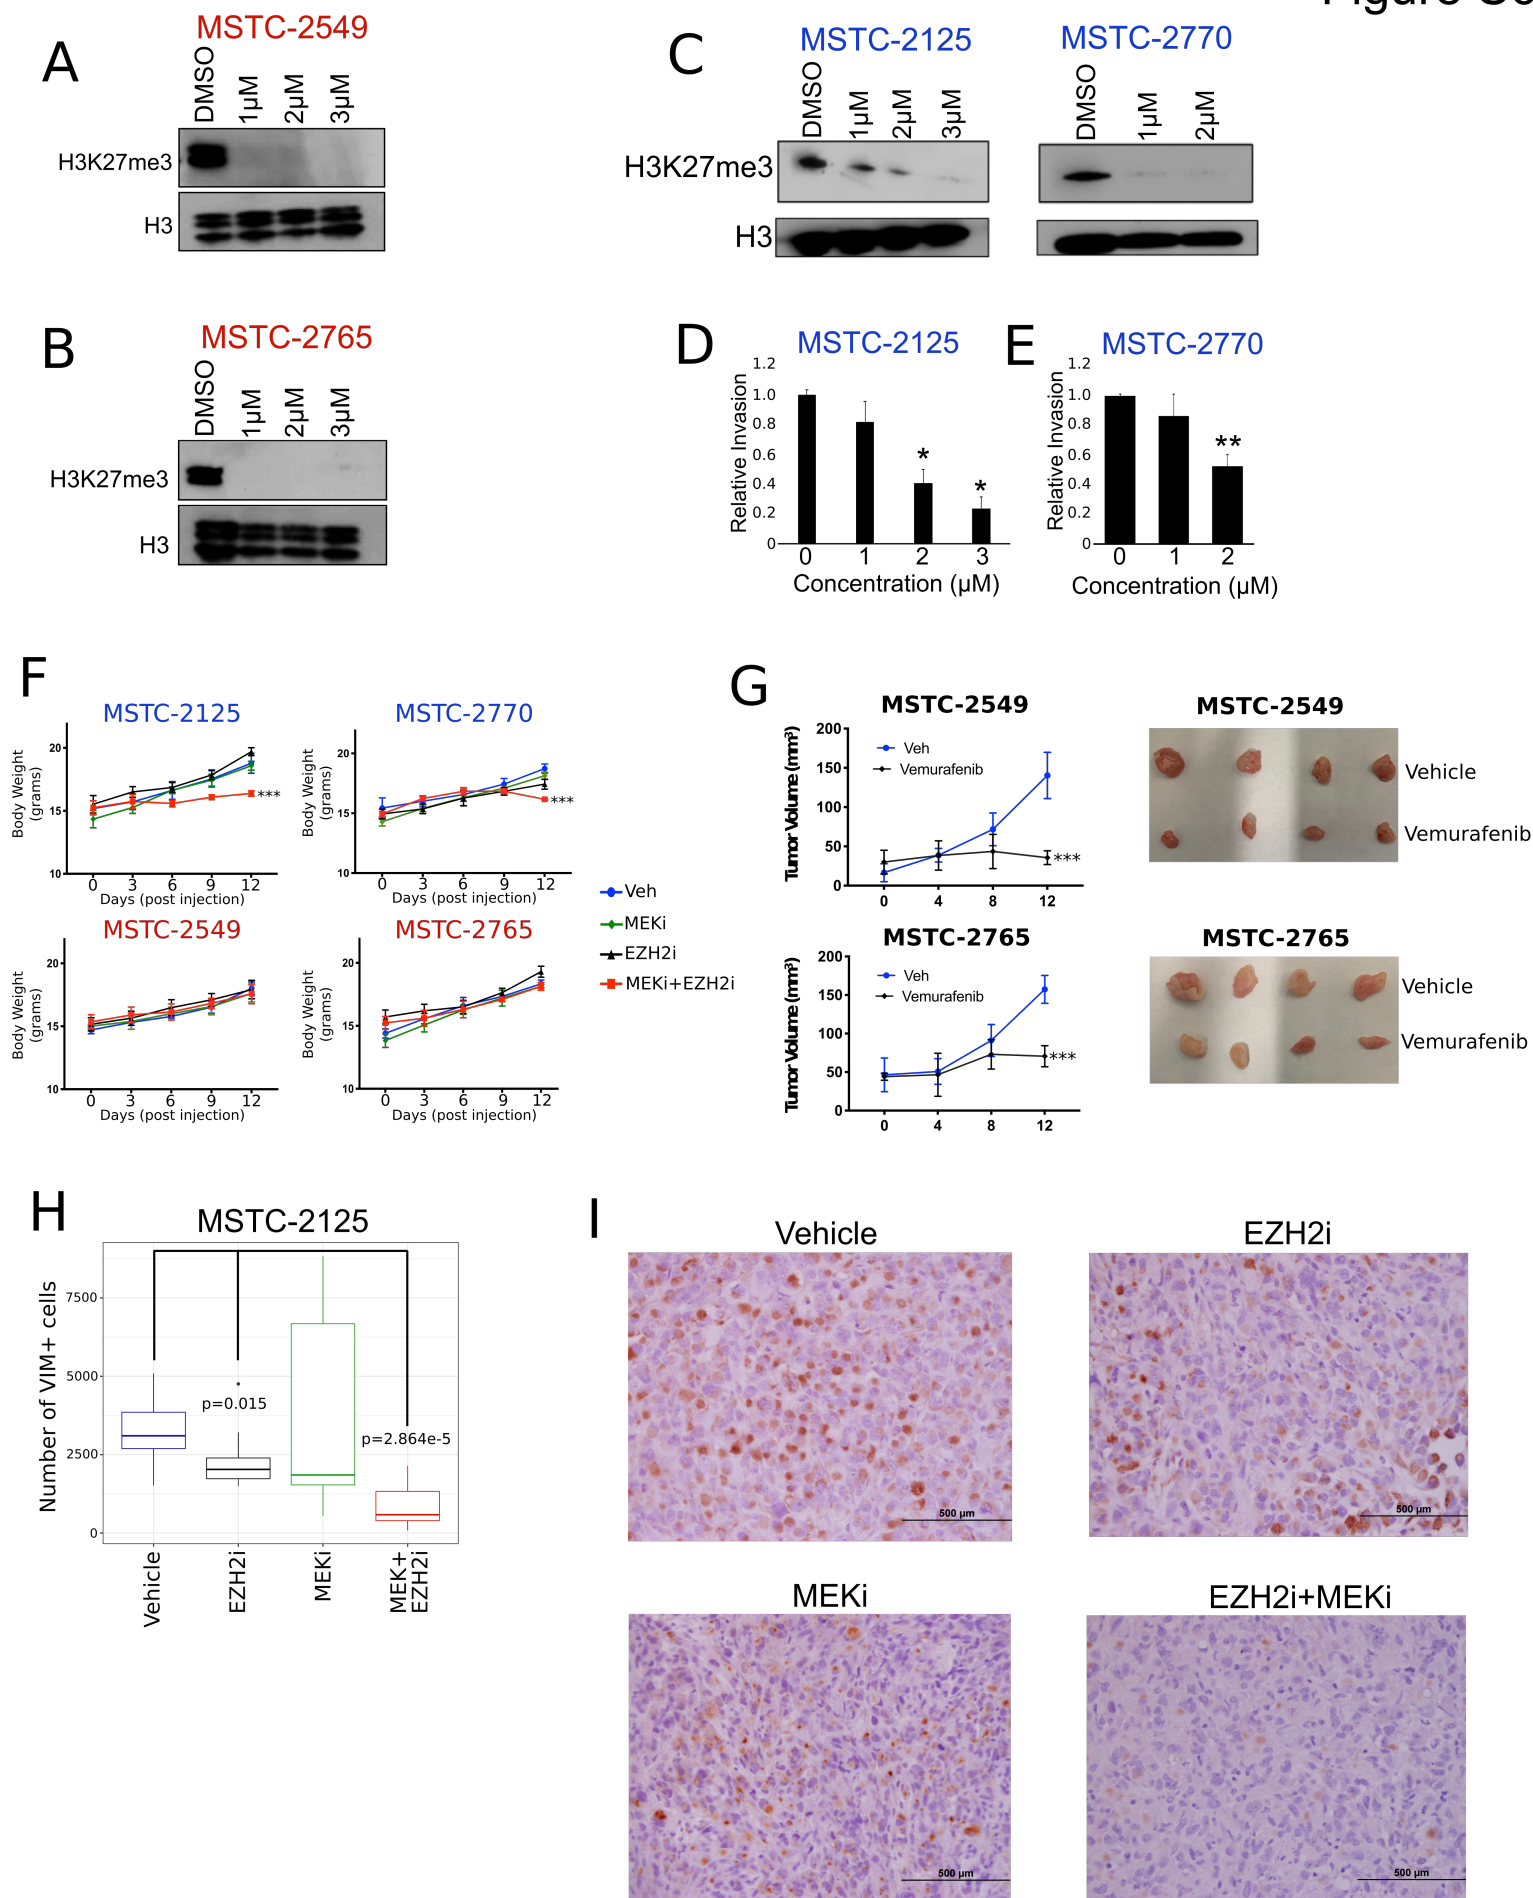

**Figure S6: Inhibition of EZH2 decreases invasion and tumor burden in NRAS -mutant melanoma. Related to Figure 6.**

A-B) Western blotting for H3K27me3 in *BRAF*-mutant MSTC cell lines 2549 and B) 2765 treated for 14 days with GSK-126 or DMSO.

C) Western blotting for H3K27me3 in *NRAS*-mutant MSTC cell lines 2125 and 2770 treated for 14- or 10-days respectively with 3-Deazaneplanocin A (DZNep) or DMSO.

D-E) Boyden chamber invasion assay in *NRAS*-mutant MSTC cell lines 2125 and E) 2770 treated for 14- or 10- days respectively with 3-Deazaneplanocin A (DZNep) or DMSO. P-values were calculated using a t-test. \* =  $p < 0.05$ ; \*\* =  $p = 0.001$ . Error bars represent mean  $\pm$  S.E.M.

F) Body weight of mice xenograft tumors from MSTC-2125, MSTC-2770, MSTC-2549 and MSTC-2765 treated with Vehicle, MEKi (Trametinib), EZH2i (GSK-126) or MEKi + EZH2i. P-values represent pairwise t-test comparison between the experimental arm to vehicle treatment. \*\*\* =  $p < 0.001$ . Error bars represent mean  $\pm$  S.E.M.

G) Tumor volume curves for *BRAF*-mutant melanoma cultures MSTC-2549 and MSTC-2765 upon treatment with Vehicle and BRAF-inhibitor Vemurafenib (n = 4 for each arm). P-values represent pairwise t-test comparison between the experimental arm to vehicle treatment. \*\*\* =  $p < 0.001$ . Error bars represent mean  $\pm$  S.E.M.

H) Barplot displaying the number of Vimentin positive cells from immunochemistry in MSTC-2125 mouse tumors treated with Vehicle, EZH2i, MEKi or EZH2i+MEKi. Cells were counted using imageJ based on a minimum of 9 20x images from each sample. P-values were calculated using a wilcoxon test.

I) Representative images from immunohistochemistry staining for Vimentin in MSTC-2125 mouse tumors treated with Vehicle, EZH2i, MEKi or EZH2i+MEKi. Scale bar represent 500 $\mu$ M.
